# Supplementary material for: Non-chromatographic speciation of inorganic arsenic by atomic fluorescence spectrometry with flow injection hydride generation with a tetrahydroborate-form anion-exchanger
Source: Royal Society of Chemistry journal article supplement (doi:10.1039/c3ja50376c), 2014-01-01
Supplement: c3ja50376c.pdf [file c3ja50376c.pdf]

## Non-chromatographic speciation of inorganic arsenic by atomic fluorescence spectrometry with flow injection hydride generation by a tetrahydroborate-form anion-exchanger

Nan Wang and Julian Tyson

Department of Chemistry, University of Massachusetts, 710 North Pleasant Street, Amherst, MA 01003, USA. E-mail Tyson@chem.umass.edu.

### Supplementary information.

The well water and seawater samples were analyzed for 21 elemental constituents by plasma source mass spectrometry. The samples were acidified with 2% high purity nitric acid (Fisher Scientific certified ACS grade), filtered through 0.45 $\mu$ m polyethersulfone membrane Whatman Puradisc syringe filters that were 25 mm in diameter, stored at 4 °C until analysis and measured without further dilution.

The instrument (a PerkinElmer Sciex Elan model 6100) was operated according to the manufacturer's recommended conditions, which are shown in Table S1. Correction for isobaric overlap was applied according to the default conditions of the manufacturer's software. External calibration, with standards prepared by serial dilution of Quality Control Standard 21 (PerkinElmer, Waltham, MA, USA), covering the range 0 – 100 mg L<sup>-1</sup>, was used. The results are given in Table S2, including the values for arsenic, which is one of the 21 elements in the standard solution.

**Table S1.** Operating conditions for plasma source mass spectrometer

| Parameter  | Setting                  |
|------------|--------------------------|
| RF Power   | 1500 W                   |
| Nebulizer  | 1.01 L min <sup>-1</sup> |
| Gas Flow   |                          |
| Nebulizer  | Gem Tip Cross-Flow II    |
| Type       |                          |
| Spray      | Scott                    |
| Chamber    |                          |
| Detector   | Dual mode                |
| Mode       |                          |
| Sample/Ski | Nickel                   |
| mmer       |                          |
| Cones      |                          |
| Dwell Time | 100 ms per point         |
| Scanning   | Peak hopping             |
| Mode       |                          |

|                      |                                                                                                                                                                                                                                                                                                                                                                                           |
|----------------------|-------------------------------------------------------------------------------------------------------------------------------------------------------------------------------------------------------------------------------------------------------------------------------------------------------------------------------------------------------------------------------------------|
| Number of replicates | 10                                                                                                                                                                                                                                                                                                                                                                                        |
| Isotopes             | <sup>75</sup> As, <sup>9</sup> Be, <sup>43</sup> Ca, <sup>111</sup> Cd, <sup>59</sup> Co, <sup>52</sup> Cr, <sup>63</sup> Cu, <sup>57</sup> Fe, <sup>7</sup> Li, <sup>24</sup> Mg, <sup>55</sup> Mn, <sup>98</sup> Mo, <sup>60</sup> Ni, <sup>208</sup> Pb, <sup>121</sup> Sb, <sup>82</sup> Se, <sup>88</sup> Sr, <sup>47</sup> Ti, <sup>205</sup> Tl, <sup>51</sup> V, <sup>66</sup> Zn |

**Table S2.** Elemental concentrations ( $\mu\text{g L}^{-1}$ ) in natural water samples measured by ICP-MS

| Element                                   | Well Water 1 <sup>f</sup> | Well Water 1 | Well Water 2 <sup>f</sup> | Well Water 2 | Seawater 1 | Seawater 2 |
|-------------------------------------------|---------------------------|--------------|---------------------------|--------------|------------|------------|
| As                                        | 1.45                      | 1.29         | 1.01                      | 0.81         | 41.6       | 42.2       |
| Ti                                        | 1.71                      | 1.60         | 2.64                      | 2.83         | 45.6       | 56.1       |
| Be                                        | ND                        | ND           | ND                        | ND           | ND         | ND         |
| Ca                                        | 18800                     | 19200        | 4390                      | 4340         | 107000     | 114000     |
| Cd                                        | 0.035                     | 0.010        | 0.016                     | 0.014        | 0.101      | 0.094      |
| Co                                        | 0.309                     | 0.166        | 0.097                     | 0.094        | 0.863      | 0.824      |
| Cr                                        | 1.03                      | 1.20         | 0.57                      | 0.51         | 0.89       | 0.84       |
| Cu                                        | 296                       | 213          | 27                        | 22           | 18         | 16         |
| Li                                        | 2.6                       | 2.9          | 2.2                       | 2.3          | 106        | 115        |
| Fe                                        | 196                       | 202          | 50                        | 48           | 1150       | 1220       |
| Mg                                        | 1830                      | 2040         | 1590                      | 1610         | NM         | NM         |
| V                                         | 0.76                      | 0.62         | 0.62                      | 0.58         | 19.7       | 21.4       |
| Mn                                        | 1.37                      | 1.99         | 1.39                      | 1.30         | 39.6       | 1.21       |
| Ni                                        | 9.18                      | 2.05         | 3.78                      | 0.57         | 6.70       | 7.24       |
| Zn                                        | 2084                      | 19           | 320                       | 17           | 13         | 6          |
| Se                                        | ND                        | 0.15         | 0.15                      | 0.33         | ND         | ND         |
| Sr                                        | 423                       | 43           | 30                        | 30           | 3330       | 3390       |
| Mo                                        | 0.04                      | 0.02         | 3.0                       | 3.0          | 3.1        | 5.5        |
| Sb                                        | 1.14                      | 0.03         | 0.02                      | 0.02         | 0.11       | 0.09       |
| Tl                                        | 0.06                      | 0.05         | 0.04                      | 0.04         | 0.05       | 0.05       |
| Pb                                        | 1.26                      | 0.43         | 0.40                      | 0.50         | 0.38       | 0.23       |
| f first draw sample                       |                           |              |                           |              |            |            |
| ND not detected                           |                           |              |                           |              |            |            |
| NM not measured as concentration too high |                           |              |                           |              |            |            |

It may be seen that the values for arsenic are consistent with those obtained by HG-AFS yields for the well water samples, that the values for the seawater samples are much higher than the results from the AFS measurements. There are several possible polyatomic interfering species, including <sup>40</sup>Ar<sup>35</sup>Cl, <sup>40</sup>Ar<sup>34</sup>SH, and <sup>40</sup>Ca<sup>35</sup>Cl, that could be responsible.

Typical operating conditions of the AFS spectrometer in continuous-flow mode are given in

Table S3 for the three replicate measurements, and for the column-based HG mode in Table S4. The major difference is that in the continuous-flow mode, the hydrogen for the flame atomizer is generated continuously from the reaction between the borohydride and hydrochloric acid, requiring continuous deliver of a relatively high concentration of acid.

**Table S3** Operating conditions for AFS continuous flow HG-AFS system

| Parameter                                                                              | Value      |
|----------------------------------------------------------------------------------------|------------|
| HCl Concentration                                                                      | 4 M        |
| HCl flow rate                                                                          | 9 mL/min   |
| Sample preparation volume                                                              | 50 mL      |
| NaBH <sub>4</sub> Concentration                                                        | 0.7%       |
| NaBH <sub>4</sub> flow rate                                                            | 4.5 mL/min |
| Sample running time                                                                    | 80s        |
| HCl consumption from sample<br>(4 M x 50 mL)                                           | 200 mmol   |
| HCl consumption from blank<br>(4 M x 9 mL/min x 3 x 80 s/60 s min <sup>-1</sup> )      | 144 mmol   |
| HCl consumption in total                                                               | 344 mmol   |
| NaBH <sub>4</sub> consumption<br>(0.7% x 4.5 mL/min x 80 s/60 s min <sup>-1</sup> x 3) | 126 mg     |

**Table S4** Anion-exchanger HG conditions

| Parameter                                               | Value      |
|---------------------------------------------------------|------------|
| HCl Concentration                                       | 0.1 M      |
| Sample Volume                                           | 0.5 mL     |
| Sample preparation volume                               | 25 mL      |
| NaBH <sub>4</sub> Concentration                         | 5%         |
| NaBH <sub>4</sub> flow rate                             | 4.5 mL/min |
| NaBH <sub>4</sub> loading time (for triplicate)         | 60 s       |
| HCl consumption (0.1 M x 25 mL)                         | 2.5 mmol   |
| NaBH <sub>4</sub> consumption (5% x 1 min x 4.5 mL/min) | 225 mg     |
